# Supplementary material for: Phosphorylation of Influenza A Virus Matrix Protein 1 at Threonine 108 Controls Its Multimerization State and Functional Association with the STRIPAK Complex
Source: PubMed Central journal article supplement (PMC9973344; doi:10.1128/mbio.03231-22), 2023-01-05
Supplement: mbio.03231-22-sf001.pdf [file mbio.03231-22-sf001.pdf]

## Supplementary Figures

Lu Liu, Axel Weber, Uwe Linne, Mahmoud Shehata, Stephan Pleschka, Michael Kracht and M. Lienhard SCHMITZ

### Phosphorylation of influenza matrix protein 1 at T108 controls its multimerization state and functional association with the STRIPAK complex

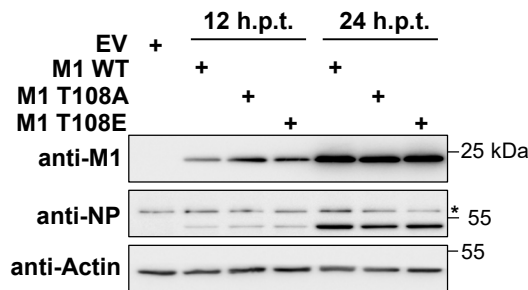

**Suppl. Fig. S1. Substitutions at M1 T108 do not affect the M1 protein expression levels.** 293T cells were transfected to express the SC35M genome together with WT M1 or its phosphorylation-defective or phospho-mimicking versions. Extracts from cells lysed at 12 and 24 h.p.t. were further analyzed by immunoblotting for protein expression as shown.
