# Supplementary material for: Phosphorylation of Influenza A Virus Matrix Protein 1 at Threonine 108 Controls Its Multimerization State and Functional Association with the STRIPAK Complex
Source: PubMed Central journal article supplement (PMC9973344; doi:10.1128/mbio.03231-22), 2023-01-05
Supplement: mbio.03231-22-sf004.pdf [file mbio.03231-22-sf004.pdf]

## Supplementary Figures

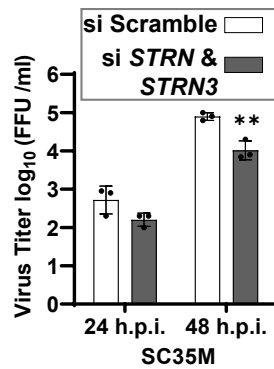

**Suppl. Fig. S4. Effect of the STRN/STRN3 on SC35M replication in 293T cells.** Expression of *STRN/STRN3* was reduced upon knockdown with specific siRNAs. Cells were infected with SC35M virus (MOI = 0.001) and the viral titers were determined at the indicated time points. Bars indicate means  $\pm$  s.d. obtained from three independent experiments performed in triplicates, asterisks indicate *P* values (\*\**P*  $\leq$  0.01).
